# Supplementary material for: Variation in Communication and Family Visiting Policies in Italian Intensive Care Units during the COVID-19 Pandemic: A Secondary Analysis of the COVISIT International Survey
Source: MDPI journal article supplement (doi:10.3390/healthcare11050669), 2023-02-24
Supplement: s1 [file s1]

# Variation in Communication and Family Visiting Policies in Italian Intensive Care Units during the COVID-19 Pandemic: A Secondary Analysis of the COVISIT International Survey

Barbara Simone <sup>1</sup>, Mariachiara Ippolito <sup>1,2</sup>, Pasquale Iozzo <sup>2</sup>, Francesco Zuccaro <sup>3</sup>,  
Antonino Giarratano <sup>1,2</sup>, Maurizio Cecconi <sup>4,5</sup>, Alexis Tabah <sup>6,7,8</sup> and Andrea Cortegiani <sup>1,2,\*</sup>

<sup>1</sup> Department of Surgical, Oncological and Oral Science, University of Palermo, Via Liborio Giuffrè 5, 90127 Palermo, Italy

<sup>2</sup> Department of Anaesthesia, Intensive Care and Emergency, University Hospital Policlinico Paolo Giaccone, 90127 Palermo, Italy

<sup>3</sup> Department of Anesthesia and Intensive Care, Ospedale Madonna delle Grazie, Azienda Sanitaria Matera, 75100 Matera, Italy

<sup>4</sup> Department of Biomedical Sciences, Humanitas University, Via Rita Levi Montalcini 4, Pieve Emanuele, 20072 Milan, Italy

<sup>5</sup> Department of Anesthesia and Intensive Care, IRCCS Humanitas Research Hospital, Via Manzoni 56, Rozzano, 20089 Milan, Italy

<sup>6</sup> Intensive Care Unit, Redcliffe Hospital, Metro North Hospital and Health Services, Redcliffe, QLD 4020, Australia

<sup>7</sup> School of Clinical Sciences, Queensland University of Technology, Brisbane, QLD 4000, Australia

<sup>8</sup> Antimicrobial Optimisation Group, UQ Centre for Clinical Research, The University of Queensland, Brisbane, QLD 4029, Australia

\* Correspondence: andrea.cortegiani@unipa.it; Tel.: +39-0916552751

**Table S1.** Characteristics of respondent ICUs from Italy over the three study periods.

| Characteristics                | Before COVID-19<br>n (%) | At Peak  | At time of survey |
|--------------------------------|--------------------------|----------|-------------------|
| ICU patients with COVID-19 (%) |                          | n= 116   | n= 117            |
| Less than 25                   | -                        | 42 (36%) | 50 (43%)          |
| 25 to 49                       | -                        | 4 (3%)   | 4 (3%)            |
| 50 to 89                       | -                        | 9 (8%)   | 21 (18%)          |
| 90 or more                     | -                        | 61 (53%) | 42 (36%)          |
| Total number of ICU beds       | n=88                     | n=118    | n= 117            |
| 1 to 8                         | 42 (48%)                 | 19 (16%) | 29 (25%)          |
| 9 to 16                        | 36(41%)                  | 42 (36%) | 47 (40%)          |
| 17 to 24                       | 5 (6%)                   | 30 (25%) | 22 (19%)          |
| 25 to 40                       | 3(3%)                    | 19 (16%) | 12 (10%)          |
| More than 40                   | 2 (2%)                   | 8 (7%)   | 7 (6%)            |
| Senior doctor to patient ratio | n=81                     | n=108    | n= 105            |
| Less than 1:6                  | 41 (51%)                 | 38 (35%) | 41 (39%)          |
| 1:6 to 1:10                    | 40 (49%)                 | 57(53%)  | 54 (51%)          |
| More than 1:10                 | 0 (0%)                   | 13 (12%) | 10 (10%)          |
| Junior doctor-to-patient ratio | n=46                     | n=76     | n= 76             |
| Less than 1:6                  | 26 (57%)                 | 36 (47%) | 33 (43%)          |
| 1:6 to 1:10                    | 20 (43%)                 | 32 (42%) | 34 (45%)          |
| More than 1:10                 | 0 (0%)                   | 8 (11%)  | 9 (12%)           |

| Nurse-to-patient ratio | n=80     | n=110    | n= 108   |
|------------------------|----------|----------|----------|
| 1:1                    | 0 (0%)   | 0 (0%)   | 1 (1%)   |
| 1:2                    | 54 (68%) | 52 (47%) | 74 (69%) |
| 1:3                    | 22 (28%) | 43 (39%) | 27 (25%) |
| <i>More than 1:3</i>   | 4 (5%)   | 15 (14%) | 6 (6%)   |

---
